# Supplementary material for: Mitochondrial Ca2+-coupled generation of reactive oxygen species, peroxynitrite formation, and endothelial dysfunction in Cantú syndrome
Source: JCI journal article supplement (doi:10.1172/jci.insight.176212), 2024-08-01
Supplement: sd1 [file 1]

## Supplemental Data for:

### Mitochondrial Ca<sup>2+</sup>-coupled generation of reactive oxygen species, peroxynitrite formation, and endothelial dysfunction in Cantú syndrome

Elsayed Metwally<sup>1,2</sup>, Alfredo Sanchez Solano<sup>1</sup>, Boris Lavanderos<sup>1</sup>, Evan Yamasaki<sup>1</sup>, Pratish Thakore, Conor McClenaghan<sup>3</sup>, Natalia Rios<sup>4,5</sup>, Rafael Radi<sup>4,5</sup>, Yumei Feng Earley<sup>1</sup>, Colin G. Nichols<sup>6</sup>, and Scott Earley<sup>1\*</sup>

<sup>1</sup>Department of Pharmacology, Center for Molecular and Cellular Signaling in the Cardiovascular System, University of Nevada, Reno School of Medicine, Reno, NV 89557-0318, USA

<sup>2</sup>Department of Cytology and Histology, Faculty of Veterinary Medicine, Suez Canal University, Ismailia, Egypt

<sup>3</sup>Departments of Pharmacology and Medicine, Center for Advanced Biotechnology and Medicine, Robert Wood Johnson Medical School, Rutgers University, Piscataway, NJ 08854, USA

<sup>4</sup>Departamento de Bioquímica, Facultad de Medicina, Centro de Investigaciones Biomédicas, Universidad de la República, Montevideo, Uruguay

<sup>5</sup>Centro de Investigaciones Biomédicas (CEINBIO), Facultad de Medicina, Universidad de la República, Montevideo, Uruguay

<sup>6</sup>Center for the Investigation of Membrane Excitability Diseases, and Departments of Cell Biology and Physiology, Washington University School of Medicine, St. Louis, MO, USA

**\*Address Correspondence to:** Scott Earley, Ph.D.  
Department of Pharmacology/MS 0318  
University of Nevada, Reno  
School of Medicine, Manville 8  
Reno, NV 89557-0318, USA  
Phone: (775) 784-4117  
Fax: (775) 784-1620  
Email: [searley@med.unr.edu](mailto:searley@med.unr.edu)

**This PDF file includes:**

- **Supplemental Figures: 1-12**
- **Supplemental Videos Legends: 1-3**

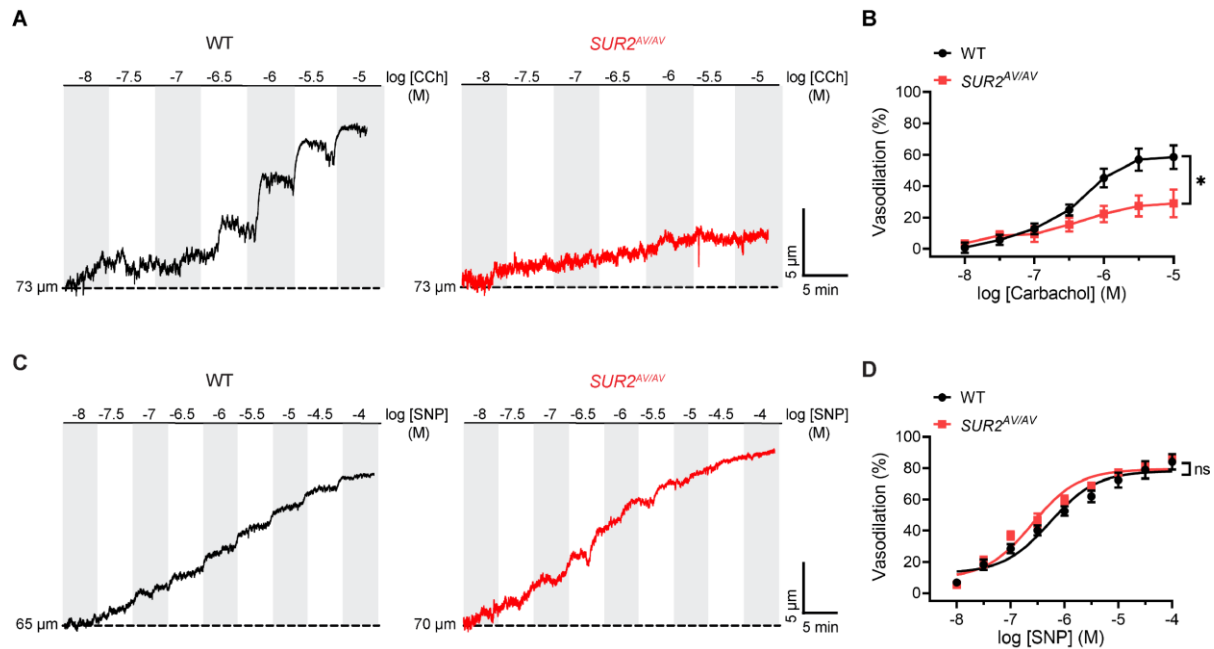

**Supplemental Figure 1. Endothelium-dependent vasodilation is blunted in  $\text{SUR2}^{\text{AV/AV}}$  mice.** (A) Representative recordings and (B) summary data showing endothelium-dependent vasodilation induced by CCh (muscarinic receptor agonist) in mesenteric arteries from WT and  $\text{SUR2}^{\text{AV/AV}}$  mice. Data are presented as means  $\pm$  SEM ( $n = 8$  vessels from four animals per group;  $*p < 0.05$ , two-way ANOVA with Šídák's multiple comparisons test). (C) Representative recording and (D) summary data showing vasodilatory responses to the •NO donor SNP in isolated mesenteric arteries from WT and  $\text{SUR2}^{\text{AV/AV}}$  mice. Data are presented as means  $\pm$  SEM ( $n = 8$  vessels from four animals per group; ns = not significant, two-way ANOVA with Šídák's multiple comparisons test).

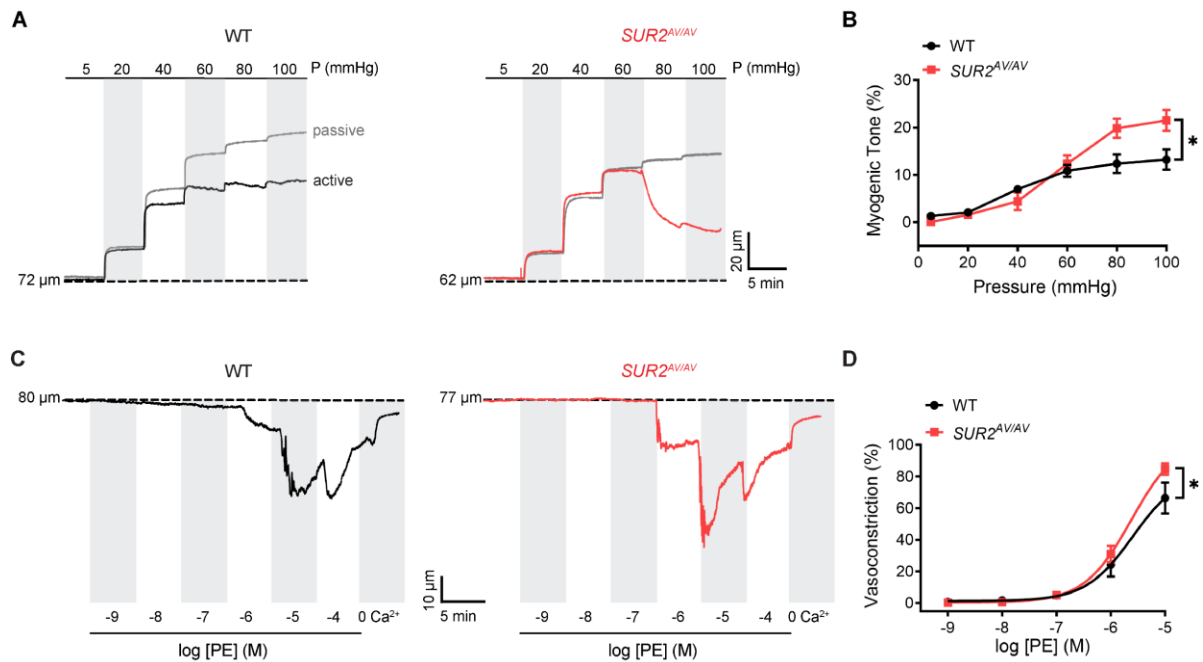

**Supplemental Figure 2. Mesenteric arteries from *SUR2<sup>AV/AV</sup>* mice are hypercontractile.** (A) Typical recording of the changes in lumen diameter of third-order mesenteric arteries from WT and *SUR2<sup>AV/AV</sup>* mice in response to increases in intraluminal pressure under active and passive ( $\text{Ca}^{2+}$ -free) conditions. (B) Summary data from WT and *SUR2<sup>AV/AV</sup>* mice. Data are presented as means  $\pm$  SEM ( $n = 8$  vessels from four mice per group; \* $p < 0.05$ , two-way ANOVA with Šídák's multiple comparisons test). (C) Representative recording and (D) summary data showing constriction of mesenteric arteries from WT and *SUR2<sup>AV/AV</sup>* mice in response to increasing concentrations of PE ( $\alpha 1$ -adrenoceptor agonist). Data are presented as means  $\pm$  SEM ( $n = 6$  vessels from four animals per group; \* $p < 0.05$ , two-way ANOVA with Šídák's multiple comparisons test).

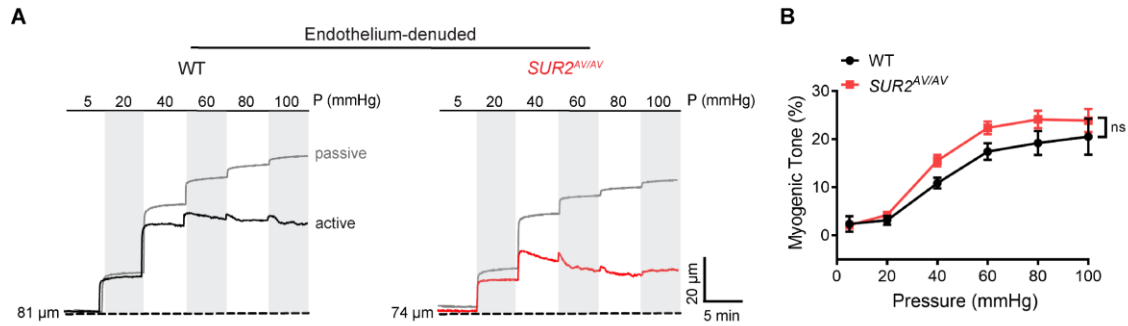

**Supplemental Figure 3. Myogenic tone does not differ between WT and *SUR2<sup>AV/AV</sup>* mice in endothelium-denuded vessels. (A)** Representative recording and **(B)** summary data of changes in lumen diameter in response to increases in intraluminal pressure under active and passive ( $\text{Ca}^{2+}$ -free) conditions in endothelium-denuded mesenteric arteries from WT and *SUR2<sup>AV/AV</sup>* mice. Data are presented as means  $\pm$  SEM ( $n = 6$  vessels from three animals per group; ns = not significant, two-way ANOVA with Šídák's multiple comparisons test).

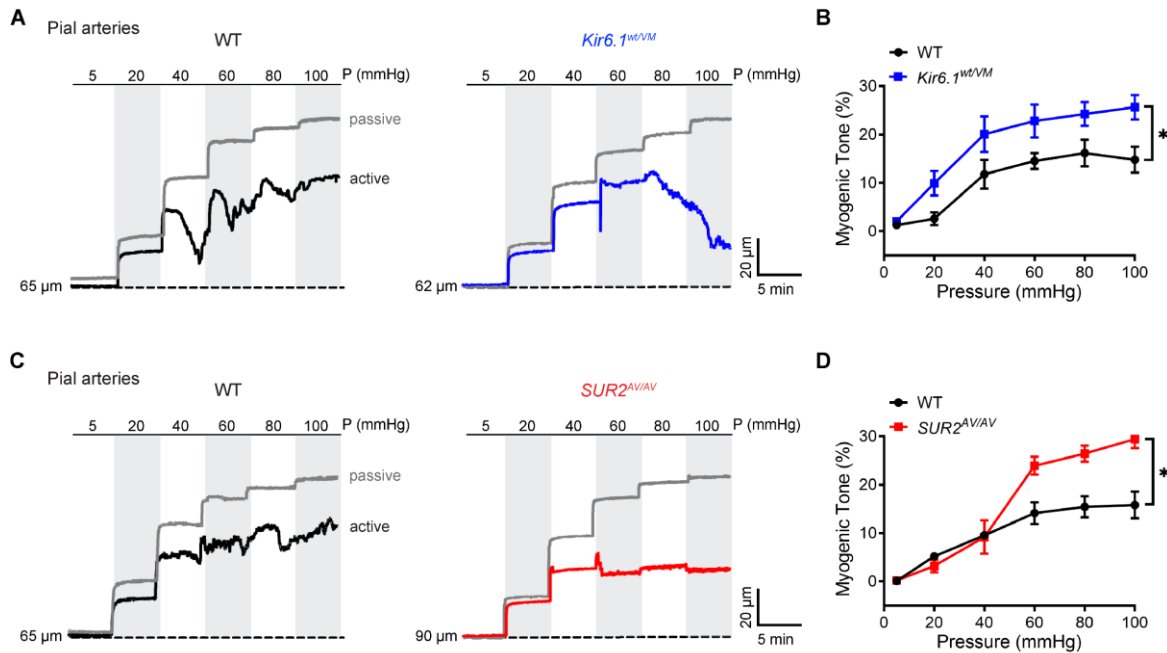

**Supplemental Figure 4. Myogenic tone is elevated in cerebral pial arteries from Cantú mice. (A)** Representative traces of the luminal diameter of isolated pial arteries from WT and *Kir6.1<sup>wt/vm</sup>* mice showing changes in lumen diameter in response to increases in intraluminal pressure under active and passive ( $\text{Ca}^{2+}$ -free) conditions. **(B)** Summary data of myogenic tone in pial arteries from WT and *Kir6.1<sup>wt/vm</sup>* mice. Data are presented as means  $\pm$  SEM ( $n = 6$  vessels from 4 animals per group;  $*p < 0.05$ , two-way ANOVA with Šídák's multiple comparisons test). **(C)** Representative traces of the luminal diameter of isolated pial arteries from WT and *SUR2<sup>AV/AV</sup>* mice showing changes in lumen diameter in response to increases in intraluminal pressure under active and passive ( $\text{Ca}^{2+}$ -free) conditions. **(D)** Summary data of myogenic tone in pial arteries from WT and *SUR2<sup>AV/AV</sup>* mice. Data are presented as means  $\pm$  SEM ( $n = 6$  vessels from 4 animals per group;  $*p < 0.05$ , two-way ANOVA with Šídák's multiple comparisons test).

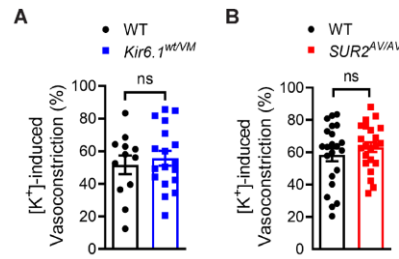

**Supplemental Figure 5. Vasoconstriction in response to elevated extracellular  $[K^+]$  does not differ between WT and Cantú mice.** Summary data showing constriction of isolated mesenteric arteries from Kir6.1<sup>wt/vm</sup> (A) and SUR2<sup>AV/AV</sup> (B) mice compared with WT controls in response to 60 mM KCl. Data are presented as means  $\pm$  SEM ( $n = 12$ –22 arteries for WT and 18–22 arteries for Cantú mice from 10–12 animals; ns: not significant, Student's *t*-test).

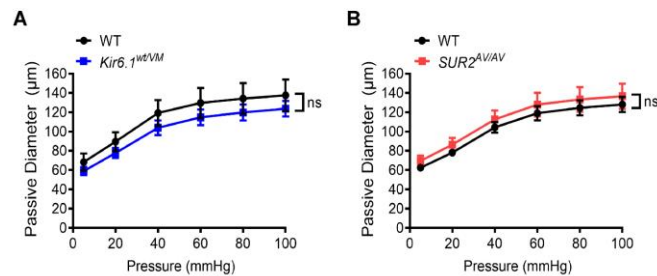

**Supplemental Figure 6. The passive diameter of mesenteric arteries does not differ between WT and Cantú mice.** Summary data showing the passive inner diameter of isolated mesenteric arteries from Kir6.1<sup>wt/vm</sup> (A) and SUR2<sup>AV/AV</sup> (B) mice compared with WT controls under  $Ca^{2+}$ -free conditions (no added  $Ca^{2+}$ , 2 mM EGTA, 10  $\mu$ M diltiazem). Data are presented as means  $\pm$  SEM ( $n = 5$ –8 vessels from 4 animals per group; ns: not significant, two-way ANOVA with Šídák's multiple comparisons test).

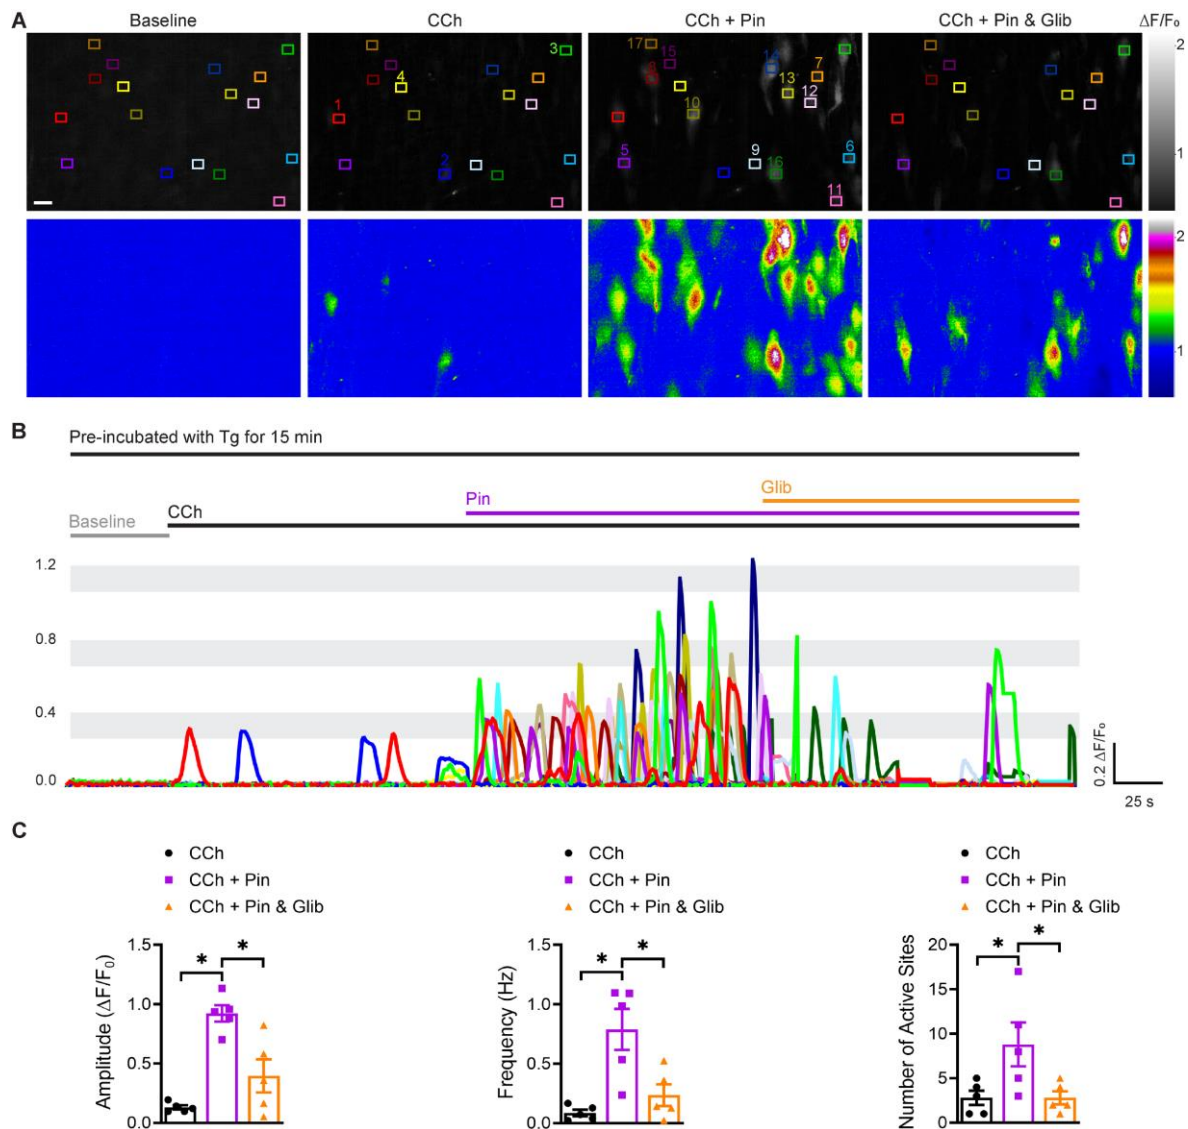

**Supplemental Figure 7.  $K_{ATP}$  channel activation increases endothelial cell  $Ca^{2+}$  influx.** (A) Representative grayscale and pseudocolored images of mesenteric arteries from Cdh5-GCaMP8 mice mounted *en face*. Arteries were pre-incubated with the sarcoendoplasmic reticulum  $Ca^{2+}$ -ATPase inhibitor thapsigargin (Tg; 2  $\mu$ M) for 15 min. Recordings were performed initially under baseline conditions and then following initiation of  $Ca^{2+}$  signals by addition of CCh (10  $\mu$ M). The tissue was then treated with pinacidil (Pin; 10  $\mu$ M) followed by treatment with glibenclamide (Glib; 10  $\mu$ M). Colored boxes show

regions of interest (ROIs) where  $\text{Ca}^{2+}$ -signaling events occurred. Scale bar = 10  $\mu\text{m}$ . **(B)** Representative  $\Delta F/F_0$  versus time plots of  $\text{Ca}^{2+}$  events from multiple  $\text{Ca}^{2+}$  event sites. **(C)** Summary data showing the effects of pinacidil and glibenclamide on the amplitude ( $\Delta F/F_0$ ), frequency (Hz), and number of active sites. Data are presented as means  $\pm$  SEM ( $n = 5$  arteries from three animals;  $*p < 0.05$ , one-way ANOVA with Tukey's multiple comparisons test).



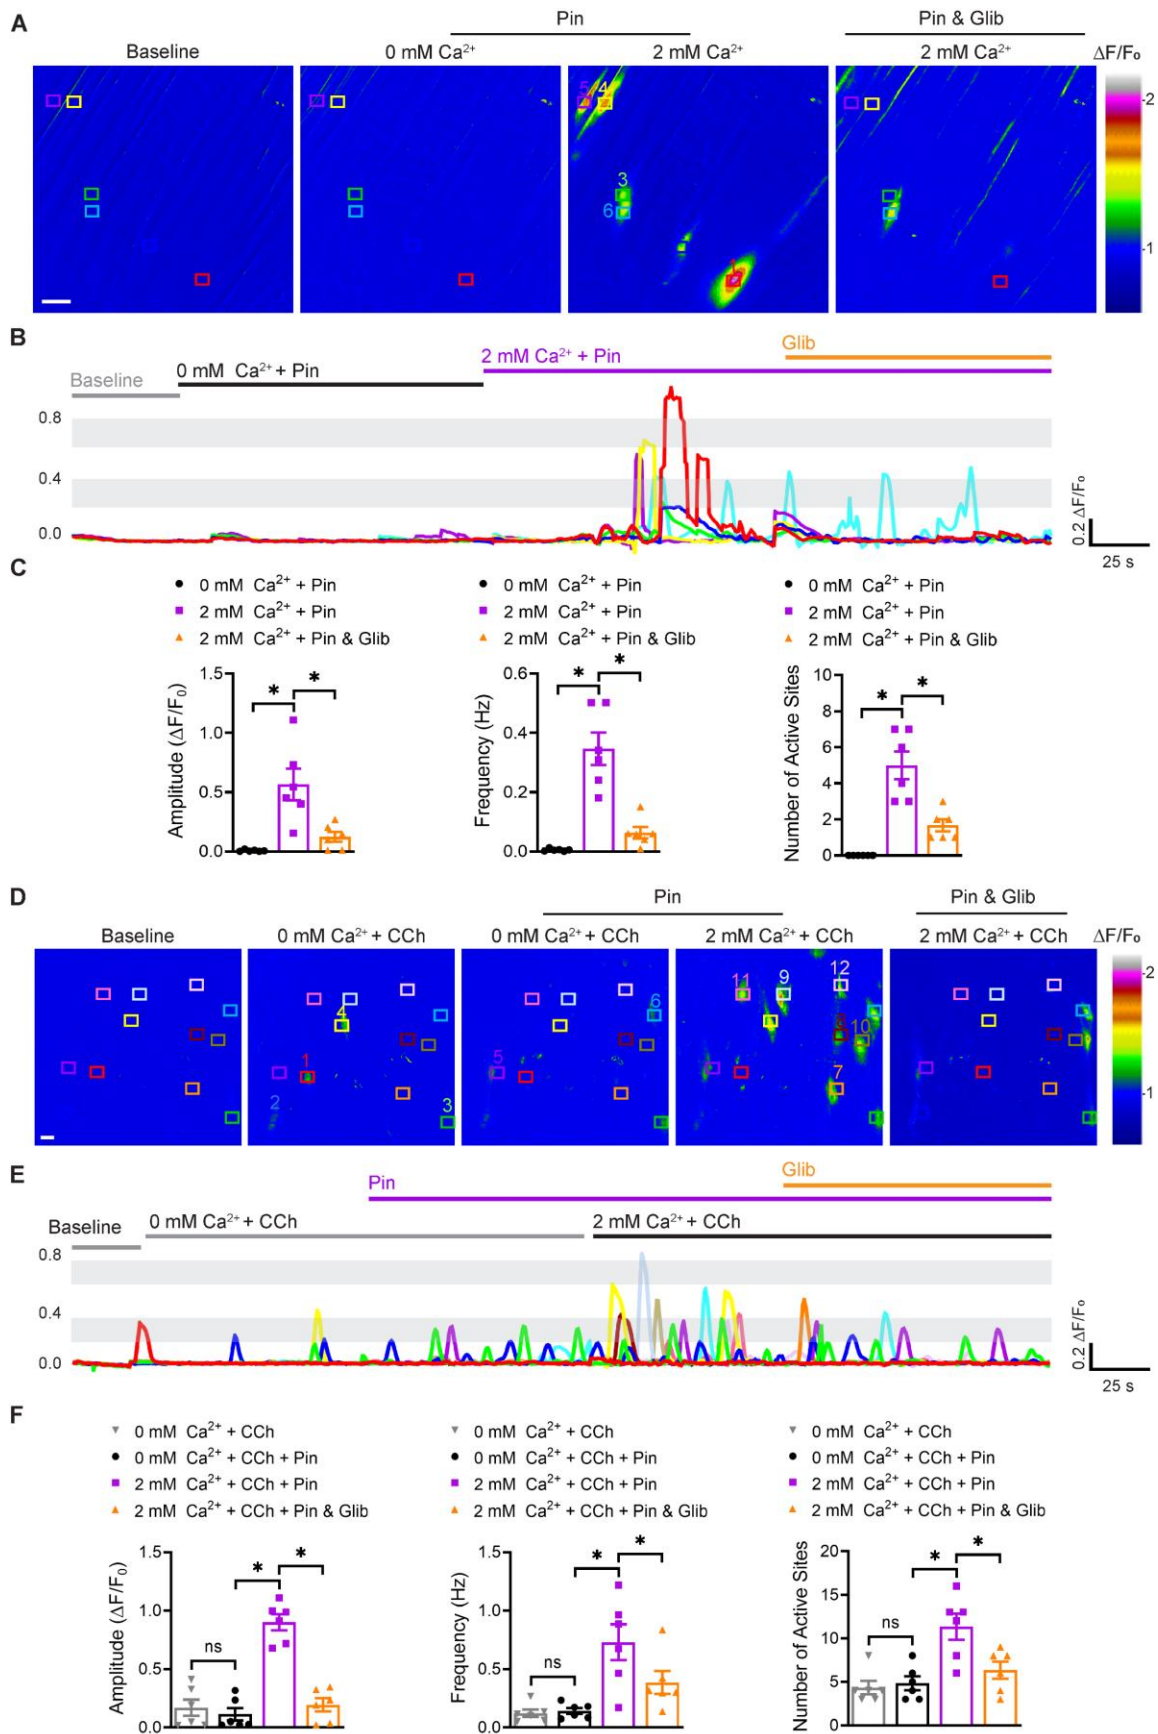

**Supplemental Figure 8. Extracellular  $\text{Ca}^{2+}$  is required for pinacidil-induced  $\text{Ca}^{2+}$  influx.** (A) Representative pseudocolored images of mesenteric arteries from *Cdh5*-GCaMP8 mice mounted *en face*. Endothelial cell  $\text{Ca}^{2+}$  signals were recorded under control conditions, then in the presence of pinacidil alone (Pin; 10  $\mu\text{M}$ ), with arteries bathed in a  $\text{Ca}^{2+}$ -free solution or a solution containing 2 mM extracellular  $\text{Ca}^{2+}$ , followed by treatment with the  $\text{K}_{\text{ATP}}$  channel blocker glibenclamide (Glib; 10  $\mu\text{M}$ ). Colored boxes show ROIs where  $\text{Ca}^{2+}$ -signaling events occurred. Scale bar = 10  $\mu\text{m}$ . (B) Representative  $\Delta\text{F}/\text{F}_0$  versus time plots of  $\text{Ca}^{2+}$  events from multiple  $\text{Ca}^{2+}$  event sites. (C) Summary data showing the effects of pinacidil on the amplitude ( $\Delta\text{F}/\text{F}_0$ ), frequency (Hz), and number of active sites for  $\text{Ca}^{2+}$  signals in  $\text{Ca}^{2+}$ -free solution or a solution containing 2 mM extracellular  $\text{Ca}^{2+}$ . Data are presented as means  $\pm$  SEM ( $n = 6$  arteries from three animals;  $*p < 0.05$ , one-way ANOVA with Tukey's multiple comparisons test). (D) Representative pseudocolored images of mesenteric arteries from *Cdh5*-GCaMP8 mice mounted *en face*. (E) Representative  $\Delta\text{F}/\text{F}_0$  versus time plots of  $\text{Ca}^{2+}$  events at multiple sites. For CCh-induced  $\text{Ca}^{2+}$  signaling, events were recorded without or with pinacidil (Pin; 10  $\mu\text{M}$ ) in the absence of extracellular  $\text{Ca}^{2+}$  or in a solution containing 2 mM extracellular  $\text{Ca}^{2+}$ , followed by treatment with glibenclamide (Glib; 10  $\mu\text{M}$ ). Colored boxes indicate ROIs with active  $\text{Ca}^{2+}$  signals. Scale bar = 10  $\mu\text{m}$ . (F) Summary data showing the effects of pinacidil at 0 mM or 2 mM extracellular  $\text{Ca}^{2+}$  in the presence of CCh. The amplitude ( $\Delta\text{F}/\text{F}_0$ ), frequency (Hz), and number of active sites for  $\text{Ca}^{2+}$  signals were analyzed. Data are presented as means  $\pm$  SEM ( $n = 6$  arteries from 3 mice;  $*p < 0.05$ , two-way ANOVA with Tukey's multiple comparisons test).

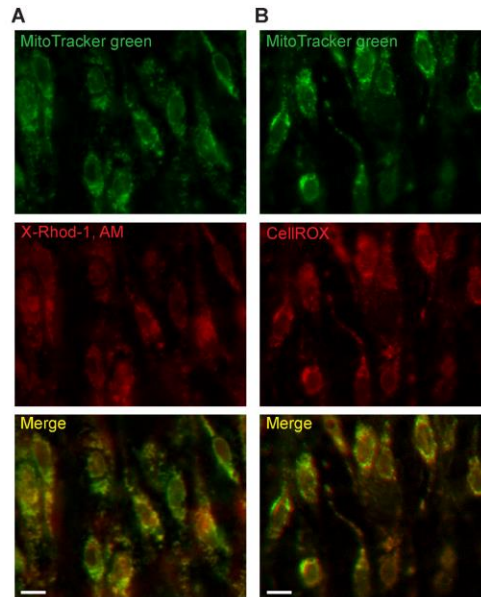

**Supplemental Figure 9. Specificity of mitochondrial labeling.** Representative confocal images of mesenteric arteries from WT mice mounted *en face*, co-labeled with MitoTracker green to identify mitochondria and (A) X-Rhod-1 or (B) CellRox. Scale bar = 10  $\mu\text{m}$ .

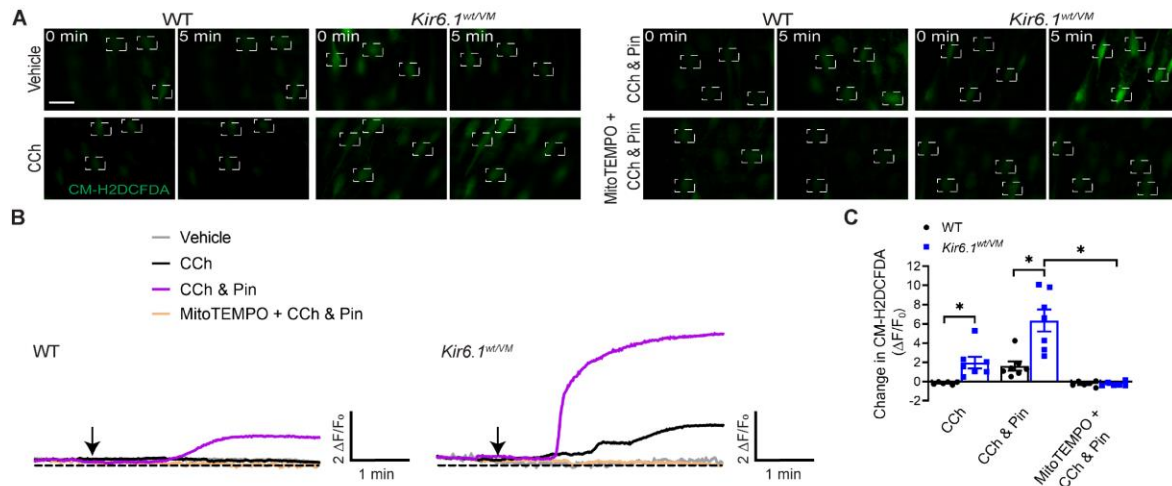

**Supplemental Figure 10. Cytosolic ROS generation is increased in the endothelium of Cantú mice.** (A) Representative images of mesenteric arteries from WT and *Kir6.1<sup>wt/vm</sup>* mice mounted *en face* and loaded with the general oxidative stress indicator CM-H2DCFDA. Changes in CM-H2DCFDA fluorescence were imaged following treatment with CCh (10  $\mu$ M), pinacidil (Pin; 10  $\mu$ M), and the mitochondrial ROS scavenger mitoTEMPO (5  $\mu$ M). Boxes show regions of interest (ROIs). Scale bar = 10  $\mu$ m. (B) Representative  $\Delta F/F_0$  versus time plots of the change in fluorescence intensity under each condition. Arrows indicate application of the agonist. (C) Summary data showing the changes in CM-H2DCFDA fluorescence intensity. Data are presented as means  $\pm$  SEM ( $n$  = 6 to 7 arteries from 3 animals per group; \* $p$  < 0.05, two-way ANOVA with Tukey's multiple comparisons test).

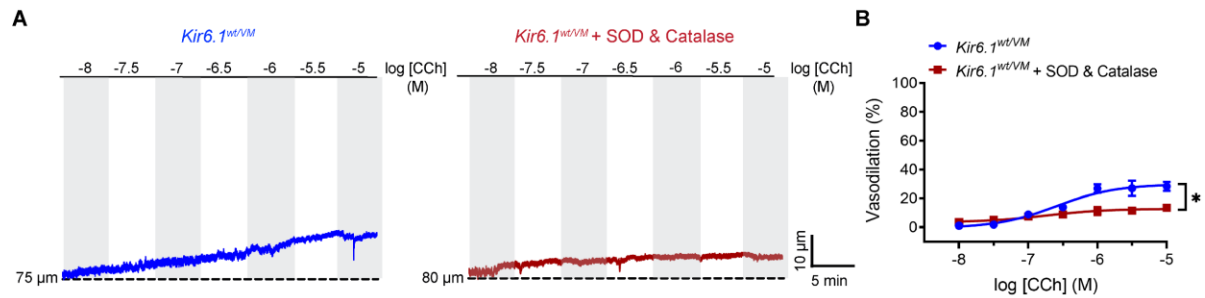

**Supplemental Figure 11. Extracellular ROS inhibition does not restore endothelium-dependent dilation in mesenteric arteries from *Kir6.1<sup>wt/VM</sup>* mice.** (A) Representative recordings and (B) summary data showing endothelium-dependent dilation evoked by CCh in mesenteric arteries from *Kir6.1<sup>wt/VM</sup>* mice before and after treatment with the extracellular ROS scavengers SOD (500 U/ml) and catalase (500 U/ml). Data are presented as means  $\pm$  SEM ( $n = 5$  vessels from 4 animals per group; \* $p < 0.05$ , two-way ANOVA with Šídák's multiple comparisons test).

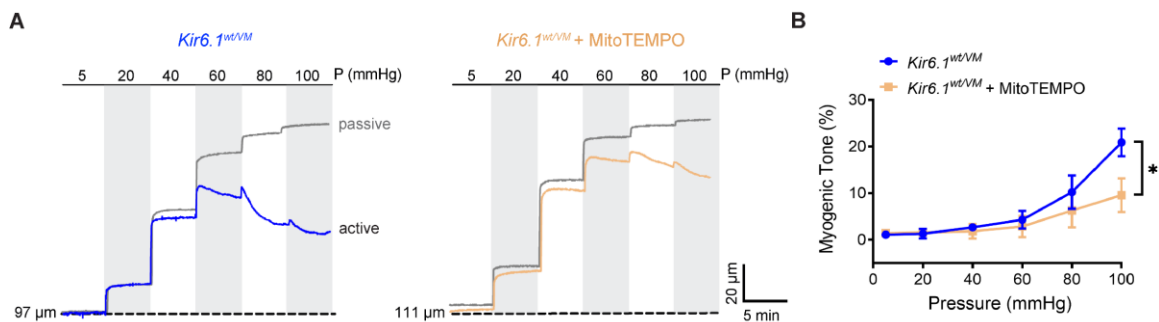

**Supplemental Figure 12. Blocking mitochondrial ROS generation reduces the hypercontractility of arteries from *Kir6.1<sup>wt/VM</sup>* mice.** (A) Representative recording showing the change in lumen diameter of mesenteric arteries from *Kir6.1<sup>wt/VM</sup>* mice in response to increases in intraluminal pressure under active and passive ( $\text{Ca}^{2+}$ -free) conditions. (B) Summary data showing myogenic tone (%) vs pressure (mmHg). Data are presented as means  $\pm$  SEM ( $n = 5$  vessels from 4 animals per group; \* $p < 0.05$ , two-way ANOVA with Šídák's multiple comparisons test).

conditions. The trace on the right shows a representative recording of an artery treated with mitoTEMPO. **(B)** Summary data showing myogenic tone in mesenteric arteries from Kir6.1<sup>wt/VM</sup> mice treated with mitoTEMPO or vehicle. Data are presented as means  $\pm$  SEM ( $n = 6-7$  vessels from 5 animals per group;  $*p < 0.05$ , two-way ANOVA with Šídák's multiple comparisons test).

### **Supplemental Videos Legends**

**Supplemental Video 1. Pharmacological activation of K<sub>ATP</sub> channels increases CCh-induced Ca<sup>2+</sup>-signaling events in mesenteric arteries from *Cdh5-GCaMP8* mice.**

Ca<sup>2+</sup> signals were recorded in the presence of CCh (10  $\mu$ M), and following treatment with pinacidil (Pin; 10  $\mu$ M) and glibenclamide (Glib; 10  $\mu$ M).

**Supplemental Video 2. Extracellular Ca<sup>2+</sup> is required for K<sub>ATP</sub> channel-induced increases in Ca<sup>2+</sup> influx.** Ca<sup>2+</sup> events were recorded in the endothelium of mesenteric arteries from *Cdh5-GCaMP8* in the presence of pinacidil (Pin; 10  $\mu$ M) in a Ca<sup>2+</sup>-free solution or a solution containing 2 mM extracellular Ca<sup>2+</sup>.

**Supplemental Video 3. CCh-induced Ca<sup>2+</sup>-signaling activity is increased in mesenteric arteries from Kir6.1<sup>wt/VM</sup> mice.** Endothelial Ca<sup>2+</sup> signals were recorded from a mesenteric artery isolated from a *Cdh5-GCaMP8* x Kir6.1<sup>wt/VM</sup> mouse in the presence of CCh (10  $\mu$ M) and following treatment with pinacidil (Pin; 10  $\mu$ M) and glibenclamide (Glib; 10  $\mu$ M).
